# Supplementary material for: Antibacterial and Antifungal Alkaloids from Asian Angiosperms: Distribution, Mechanisms of Action, Structure-Activity, and Clinical Potentials
Source: MDPI journal article supplement (doi:10.3390/antibiotics11091146), 2022-08-24
Supplement: s1 [file s1]

**Table S1.** Medicinal Plants of Asia and the Pacific yielding antibacterial and/or antifungal alkaloids

| Clade           | Family           | Genus, species                                                                                                                                                                                                                                             | Local name                                                                         | Use                                                                  | Country                                                       |
|-----------------|------------------|------------------------------------------------------------------------------------------------------------------------------------------------------------------------------------------------------------------------------------------------------------|------------------------------------------------------------------------------------|----------------------------------------------------------------------|---------------------------------------------------------------|
| Protomagnoliids | Nymphaeaceae     | <i>Nuphar japonica</i> DC.                                                                                                                                                                                                                                 | Senkotsu                                                                           | Wounds                                                               | Japan                                                         |
| Magnoliids      | Aristolochiaceae | <i>Asarum sieboldii</i> Miq.<br><i>Aristolochia</i> L.                                                                                                                                                                                                     | Jok do ri                                                                          | Fever                                                                | Korea                                                         |
|                 | Annonaceae       | <i>Annona squamosa</i> L.<br><i>Artabotrys suaveolens</i> (Bl.) Bl.<br><i>Cananga odorata</i> Hook. F. and Thom<br><i>Goniothalamus laoticus</i> (Finet & Gagnep.) Bân<br><i>Polyalthia longifolia</i> (Sonn.) Thwaites                                    | Ates<br>Akar chenana<br><br>Debdaru                                                | Fever<br>Cholera<br>Boils<br>Skin infection                          | the Philippines<br>Indonesia<br>Solomon Islands<br>Bangladesh |
|                 | Eupomatiaceae    | <i>Eupomatia laurina</i> R. Br.                                                                                                                                                                                                                            |                                                                                    |                                                                      |                                                               |
|                 | Lauraceae        | <i>Phoebe grandis</i> (Nees) Merr.<br><i>Phoebe lanceolata</i> (Nees) Nees                                                                                                                                                                                 | Changpichla                                                                        | Leucorrhoea                                                          | Bangladeh                                                     |
|                 | Magnoliaceae     | <i>Magnolia grandiflora</i> L.<br><i>Michelia alba</i> DC.                                                                                                                                                                                                 | Cempaka puteh                                                                      | Post-partum                                                          | Malaysia                                                      |
|                 | Piperaceae       | <i>Piper longum</i> L.<br><i>Piper nigrum</i> L.f.                                                                                                                                                                                                         | Pipul<br>Hu jiao                                                                   | Tuberculosis<br>Cholera                                              | Bangladesh<br>China                                           |
| Monocots        | Amaryllidaceae   | <i>Lycoris radiata</i> (L'Hér.) Herb.<br><i>Narcissus tazetta</i> L.                                                                                                                                                                                       | Shi suan<br>Shui xian                                                              | Abscesses                                                            | China<br>Abscesses China                                      |
|                 | Dioscoreaceae    | <i>Dioscorea bulbifera</i> L.                                                                                                                                                                                                                              | Man soen                                                                           | AIDS                                                                 | Thailand                                                      |
|                 | Pandanaceae      | <i>Pandanus odoratus</i> Ridl.                                                                                                                                                                                                                             | Shanlha                                                                            | Syphilis                                                             | Bangladesh                                                    |
| Eudicots        | Berberidaceae    | <i>Mahonia bealei</i> (Fortune) Carrière                                                                                                                                                                                                                   | Kuo ye shi da gong lao                                                             | Tuberculosis                                                         | China                                                         |
|                 | Fumariaceae      | <i>Chelidonium japonicum</i> Thunb.<br><i>Chelidonium majus</i> L.<br><i>Corydalis bulbosa</i> DC.<br><i>Corydalis incisa</i> (Thunb.) Pers.<br><i>Corydalis racemosa</i> (Thunb.) Pers.<br><i>Fumaria indica</i> Pugsley<br><i>Fumaria officinalis</i> L. | Sarılık out<br><br><br>Ke ye zi jin<br>Xiao hua huang jin<br>Pitpapra<br>Shaahtara | Jaundice Turkey<br>Boils<br>Abscesses<br>Abscesses<br>Fever<br>Fever | China<br>China<br>China<br>India<br>India                     |
|                 | Menispermaceae   | <i>Cyclea barbata</i> Miers<br><i>Stephania glabra</i> (Roxb.) Miers<br><i>Stephania venosa</i> (Blume) Spreng<br><i>Stephania succifera</i> H.S. Lo & Y. Tsoong<br><i>Tiliacora triandra</i> Diels                                                        | Cincau hijau<br>Muchi lota<br><br>Xiao ye di bu rong<br>Choi nang                  | Typhoid<br>Mycosis<br><br>Detoxification<br>Fever                    | Indonesia<br>Bangladesh<br><br>China<br>Thailand              |
|                 | Papaveraceae     | <i>Argemone mexicana</i> L.<br><i>Macleaya cordata</i> (Willd.) R. Br.<br><i>Papaver rhoeas</i> L.                                                                                                                                                         | Druju<br>Bo Luo Hui<br>Kopekyagi                                                   | Ulcers<br>Ringworm<br>Cough                                          | Indonesia<br>China<br>Turkey                                  |
|                 | Ranunculaceae    | <i>Coptis chinensis</i> Franch.<br><i>Delphinium denudatum</i> Wall. ex Hook. f. & Thomson                                                                                                                                                                 | Huang lian<br>Nirbasi                                                              | Antiseptic<br>Ulcers                                                 | China<br>India                                                |
| Fabids          | Brassicaceae     | <i>Capsella bursa-pastoris</i> (L.) Medik                                                                                                                                                                                                                  | Phol                                                                               | Dysentery                                                            | Pakistan                                                      |
|                 | Cucurbitaceae    | <i>Citrullus colocynthis</i> (L.) Schrad.                                                                                                                                                                                                                  | Tumba                                                                              | Leprosy                                                              | Pakistan                                                      |
|                 | Fabaceae         | <i>Indigofera tinctoria</i> L.                                                                                                                                                                                                                             | Nilayamari                                                                         | Bronchitis                                                           | India                                                         |

|                |                                                |         |            |                 |
|----------------|------------------------------------------------|---------|------------|-----------------|
| Fagaceae       | <i>Sophora flavescens</i> Aiton                | Hu shu  | Sores      | China           |
| Phyllanthaceae | <i>Quercus dentata</i> Thunb.                  | Botolan | Boils      | the Philippines |
|                | <i>Flueggea virosa</i> (Roxb. ex Willd.) Royle |         |            |                 |
|                | <i>Phyllanthus amarus</i> Schumach. & Thonn.   |         |            |                 |
| Rhamnaceae     | <i>Ziziphus mauritiana</i> Lam.                | Putrea  | Gingivitis | Vietnam         |

Table 2. Continuation

| Clade   | Family         | Genus, species                                       | Local name     | Use           | Country          |
|---------|----------------|------------------------------------------------------|----------------|---------------|------------------|
| Malvids | Amaranthaceae  | <i>Achyranthes ferruginea</i> Roxb.                  |                | Boils         | Bangladesh       |
|         | Chenopodiaceae | <i>Haloxylon salicornicum</i> (Moq.) Bunge ex Boiss. | Lana           | Wounds        | Pakistan         |
|         | Malvaceae      | <i>Melochia corchorifolia</i> L.                     |                | Dysentery     | India            |
|         | Simaroubaceae  | <i>Brucea javanica</i> (L.) Merr.                    | Kom roi        | Fever         | Laos             |
|         | Nyctaginaceae  | <i>Mirabilis jalapa</i> L.                           | Gul e Abas     | Syphilis      | Pakistan         |
|         | Nitrariaceae   | <i>Peganum harmala</i> L.                            |                | Fever         | Pakistan         |
|         | Rutaceae       | <i>Clausena excavata</i> Burm.f.                     | Daw-hke        | Leprosy       | Daw-hke          |
|         |                | <i>Clausena harmandiana</i> (Pierre) Guillaumin      |                |               |                  |
|         |                | <i>Dictamnus albus</i> L.                            |                | Fever         | India            |
|         |                | <i>Euodia rutaecarpa</i> Benth                       |                |               |                  |
|         |                | <i>Lunasia amara</i> Blanco                          |                |               |                  |
|         |                | <i>Glycosmis pentaphylla</i> (Retz.) DC.             | Athishadla     | Boils         | Bangladesh       |
|         |                | <i>Micromelum pubescens</i> Bl.                      |                | Tuberculosis  | India            |
|         |                | <i>Murraya koenigii</i> (L.) Spreng.                 | Kari patta     | Fever         | Bangladesh       |
|         |                | <i>Murraya paniculata</i> (L.) Jack                  |                |               |                  |
|         |                | <i>Toddalia asiatica</i> (L.) Lam.                   | Dahanbaz-dahan | Jaundice      | Iran             |
|         |                | <i>Zanthoxylum</i> L.                                |                |               |                  |
| Lamiids | Simaroubaceae  | <i>Brucea javanica</i> (L.) Merr.                    | Dahun belur    | Ringworm      | Indonesia        |
|         | Sterculiaceae  | <i>Waltheria indica</i> L.                           |                | Syphilis      | the Philippines  |
|         | Acanthaceae    | <i>Strobilanthes cusia</i> (Nees) Kuntze             |                |               |                  |
|         | Apocynaceae    | <i>Alstonia scholaris</i> (L.) R.Br.                 | Watsil         | Fever         | Papua New Guinea |
|         |                | <i>Ervatamia divaricata</i> (L.) Burkill             | Tagar          | Eye infection | Bangladesh       |
|         |                | <i>Rauvolfia serpentina</i> (L.) Benth. ex Kurz      | Bomma yaza     | Gonorrhoea    | Myanmar          |
|         |                | <i>Holarrhena pubescens</i> Wall. ex G. Don          | Dangkyam       | Boils         | Bangladesh       |
|         |                | <i>Cynanchum atratum</i> Bunge                       |                | Wounds        | Korea            |
|         | Asclepiadaceae | <i>Tylophora indica</i> (Burm.f.) Merr.              | Untomul        | Dysentery     | Bngladesh        |
|         |                | <i>Tournefortia sarmentosa</i> Lam                   | Salakapo kapu  | Fever         | Papua            |
|         | Boraginaceae   | <i>Gentiana macrophylla</i> Pallas                   | Qin jiao       | Tuberculosis  | China            |
|         | Gentianaceae   | <i>Gomphandra</i> Wall. ex Lindl.                    |                |               |                  |
|         | Rubiaceae      | <i>Borreria verticillata</i> (L.) G. Mey.            | Nathaisoor     | Gonorrhoea    | India            |
|         |                | <i>Guettarda speciosa</i> L.                         | Hinma          | Wounds        | India            |

|            |                                                                                        |       |                     |                |
|------------|----------------------------------------------------------------------------------------|-------|---------------------|----------------|
| Asteraceae | <i>Neolamarckia cadamba</i> (Roxb.) Bosser<br><i>Spilanthes paniculata</i> Wall. ex DC | Kadam | Wounds<br>Dysentery | Nepal<br>India |
|------------|----------------------------------------------------------------------------------------|-------|---------------------|----------------|

---
