# Supplementary material for: Antibacterial and Antifungal Alkaloids from Asian Angiosperms: Distribution, Mechanisms of Action, Structure-Activity, and Clinical Potentials
Source: MDPI journal article supplement (doi:10.3390/antibiotics11091146), 2022-08-24
Supplement: s1 [file s1]

**Table S2.** Antibacterial and/or antifungal alkaloid *in vitro* and from the medicinal plants of Asia and the Pacific with MIC ≤ 5 µg/mL

| Microorganism                | Alkaloid                                       | Class              | LM | MM    | HM    | HP  | AP  | LP  | PSA  | P |
|------------------------------|------------------------------------------------|--------------------|----|-------|-------|-----|-----|-----|------|---|
| <b>Gram-positive cocci</b>   | Avicine                                        | Benzophenantridine |    | 367.7 |       | +   |     |     | 40.8 | + |
|                              | 8-Acetyl norchelerythrine*                     | Benzophenantridine |    | 375   |       |     | +   |     |      | + |
|                              | Chelerythrine                                  | Benzophenantridine |    | 348.4 |       | +   |     |     | 40.8 | + |
|                              | Clausamine B                                   | Carbazole          |    | 307.3 |       |     | 4.5 |     | 51.3 | + |
|                              | Cryptolepine                                   | Indoloquinoline    |    | 232.2 |       | 1.4 |     |     | 17.8 | + |
|                              | 6,6'-Dihydroxythiobinupharidine                | Quinolizidine      |    |       | 526.7 |     | 3.5 |     | 98.5 |   |
|                              | 8-Hydroxydihydrochelerythrine*                 | Benzophenantridine |    | 365.4 |       | +   |     |     | 60.4 | + |
|                              | 8-Hydroxydihydrosanguinarine                   | Benzophenantridine |    | 349.3 |       | +   |     |     | 60.4 | + |
|                              | Lysicamine*                                    | Aporphine          |    | 291.3 |       |     | 3.6 |     | 48.4 | + |
|                              | 6-Methoxydihydrosanguinarine*                  | Benzophenantridine |    | 363.4 |       |     |     |     | 48.4 | + |
|                              | 1-Methyl-2-nonyl-4(1H)-quinolone               | Quinolone          |    | 285.5 |       |     |     | 6.4 | 20.3 |   |
|                              | Methyl-2-[(Z)-5'-pentadecenyl]-4(1H)-quinolone | Quinolone          |    |       |       |     |     | +   |      |   |
|                              | Norchelerythrine                               | Benzophenantridine |    | 333.3 |       | +   |     |     | 49.8 | + |
|                              | Pendulamine A*                                 | Protoberberine     |    | 341   |       |     | +   |     |      | + |
|                              | Pendulamine B                                  | Protoberberine     |    | 339   |       |     |     |     |      | + |
|                              | Piperine                                       | Piperine           |    | 285.3 |       |     | 2.5 |     | 38.8 |   |
|                              | Tryptanthrin*                                  | Indoloquinazoline  |    |       | 248.2 |     |     | 2.4 | 49.7 | + |
|                              | Vallesamine                                    | Corynanthe indole  |    |       | 340.4 |     |     | +   | 65.6 | + |
|                              | Viroallosecurinine*                            | Securinega         |    |       | 217.2 |     |     | +   | 29.5 |   |
| <b>Gram-positive bacilli</b> | Avicine                                        | Benzophenantridine |    | 367.7 |       | +   |     |     | 40.8 | + |
|                              | Lysicamine                                     | Aporphine          |    | 291.3 |       |     | 3.6 |     | 48.4 | + |
|                              | Norchelerythrine                               | Benzophenantridine |    | 333.3 |       | +   |     |     | 49.8 | + |
|                              | Pendulamine A*                                 | Protoberberine     |    | 341   |       |     | +   |     |      |   |
|                              | Pendulamine B*                                 | Protoberberine     |    | 339   |       |     | +   |     |      | + |
| <b>Gram-negative bacilli</b> | 8-Acetyl norchelerythrine*                     | Benzophenantridine |    | 375   |       |     | +   |     |      | + |
|                              | Artabotrine                                    | Aporphine          |    | 341.1 |       |     | 3.1 |     | 51.2 | + |
|                              | Chelerythrine                                  | Benzophenantridine |    | 348.4 |       | +   |     |     | 40.8 | + |
|                              | Dehydroevodiamine                              | Indoloquinazoline  |    |       | 301.3 |     |     |     | 35.9 | + |
|                              | Harman                                         | Carbazole          |    | 182.2 |       |     | +   |     | 28.7 | + |
|                              | Lysicamine                                     | Aporphine          |    | 291.3 |       |     | 3.6 |     | 48.4 | + |
|                              | Norchelerythrine                               | Benzophenantridine |    | 333.3 |       | +   |     |     | 49.8 | + |

|                     |                    |       |       |     |  |   |  |      |   |
|---------------------|--------------------|-------|-------|-----|--|---|--|------|---|
| Pendulamine A*      | Protoberberine     | 341   |       | +   |  |   |  |      |   |
| Pendulamine B*      | Protoberberine     | 339   |       | +   |  |   |  |      | + |
| Rhetsisine*         | $\beta$ -carboline | 319.3 |       | 2.9 |  |   |  | 62.5 | + |
| Vallesamine*        | Corynanthe indole  |       | 340.4 |     |  | + |  | 65.6 | + |
| Viroallosecurinine* | Securinega         | 217.2 |       | +   |  |   |  | 29.5 |   |

Table 2. Continuation

| Microorganism            | Alkaloid               | Class                  | LM | MM    | HM | HP    | AP  | LP  | PSA  | P  |
|--------------------------|------------------------|------------------------|----|-------|----|-------|-----|-----|------|----|
| <b>Mycobacteria</b>      | Evocarpine             | Quinolinones           |    | 339.5 |    |       |     | 5.9 | 20.3 |    |
|                          | 2'-Nortiliacorinine*   | Bisbenzylisoquinoline  |    |       |    | 562.7 |     | 5.6 | 72.4 |    |
|                          | Tiliacorine*           | Bisbenzylisoquinoline  |    |       |    | 576.6 |     | 5.7 | 63.6 |    |
| <b>Yeasts</b>            | Chelerythrine          | Benzophenanthridine    |    | 348.4 |    | +     |     |     | 40.8 | +  |
|                          | Liriodenine            | Aporphine              |    | 275.0 |    |       | 3.3 |     | 48   | +  |
|                          | Piperlongumine         | Piperine               |    | 317.3 |    |       | 1.6 |     |      | 65 |
|                          | Sampangine*            | Aporphine              |    | 232.2 |    |       | 2.7 |     | 43   | +  |
|                          | Tylophorinine *        | Phenanthroindolizidine |    | 379.4 |    |       | 3.5 |     | 51   | +  |
|                          | Tylophorinidine        | Phenanthroindolizidine |    | 365.4 |    |       | 2.7 |     | 62   | +  |
|                          | Tryptanthrin           | Indoloquinazoline      |    | 248.2 |    |       | 2.4 |     | 49.7 | +  |
| <b>Filamentous fungi</b> | Cryptolepine*          | Indoloquinoline        |    | 232.2 |    | 1.4   |     |     | 17.8 | +  |
|                          | 7-Demethoxytylophorine | Phenanthroindolizidine |    | 363.4 |    |       | 4.3 |     | 30.9 | +  |
|                          | Sampangine*            | Aporphine              |    | 232.2 |    |       | 2.7 |     | 43   | +  |
|                          | Tylophorinine          | Phenanthroindolizidine |    | 379.4 |    |       | 3.5 |     | 51   | +  |

\*: MIC  $\leq$  1  $\mu$ g/mL; LM: Low molecular mass (g/mol); MM: Medium molecular mass (g/mol) ; HM: High molecular mass (g/mol); HP: Hydrophilic; AP: Amphiphilic; LP: Lipophilic; PNA: Polar surface area ( $\text{\AA}^2$ ); P: Planar
